# Supplementary material for: Environmental distribution of certain modified live-virus vaccines with a high safety profile presents a low-risk, high-reward to control zoonotic diseases
Source: PubMed Central journal article supplement (PMC6494895; doi:10.1038/s41598-019-42714-9), 2019-05-01
Supplement: 41598_2019_42714_MOESM1_ESM.pdf [file 41598_2019_42714_MOESM1_ESM.pdf]

## Supplementary Information for

### Environmental distribution of certain modified live-virus vaccines with a high safety profile presents a low-risk, high-reward to control zoonotic diseases

Authors: Jennifer R. Head, Ad Vos, Jesse Blanton, Thomas Müller, Richard Chipman,  
Emily G. Pieracci, Julie Cleaton, Ryan Wallace

Jennifer R. Head

Email: [jrhead6@gmail.com](mailto:jrhead6@gmail.com)

#### **This PDF file includes:**

Supplementary text

Figs. S1

Tables S1 to S5

References for SI reference citations

## **Supplementary Information Text**

### **Methods.**

Supplementary tables in this document provide the mathematical equations and associated parameter values, governing the probability of movement of a bait, animal, or human between the compartments shown in the diagram in Figure 1 of the text. They contain information on each parameter value used in the mathematical equation as well as their justification for use, based on literature or laboratory results. Results of laboratory studies examining shedding of the rabies virus in dog saliva as well as the challenge studies of mice with both SAD-B19 and SPBN GASGAS oral rabies vaccines are included here.

### **Results.**

A figure showing that rates of exposures, health care visits and deaths stabilizes as more and more campaigns are simulated is provided as justification that the model was run a sufficient number of simulations.

**SAD-B19 for Foxes Stability analysis of rate of exposures, health care visits, and deaths**

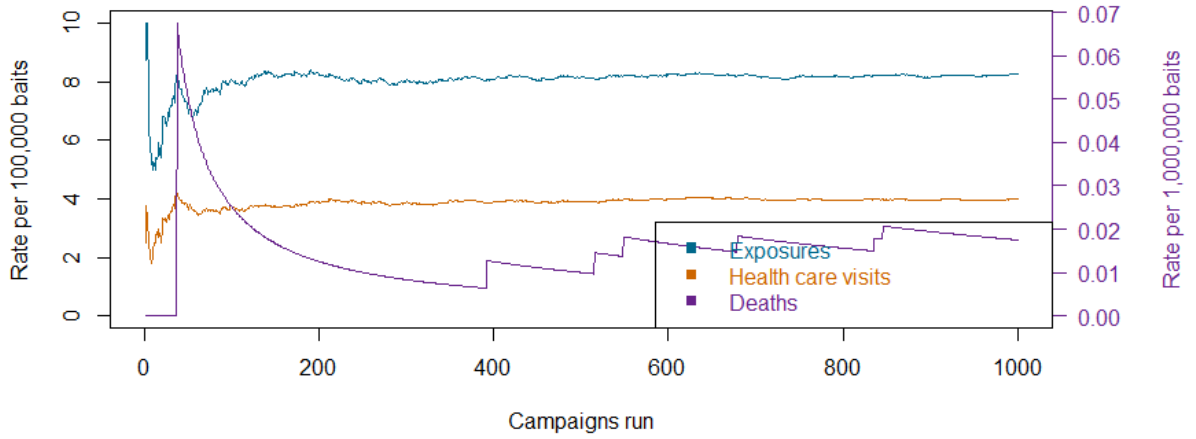

**SAD-B19 for Dogs Stability analysis of rate of exposures, health care visits, and deaths**

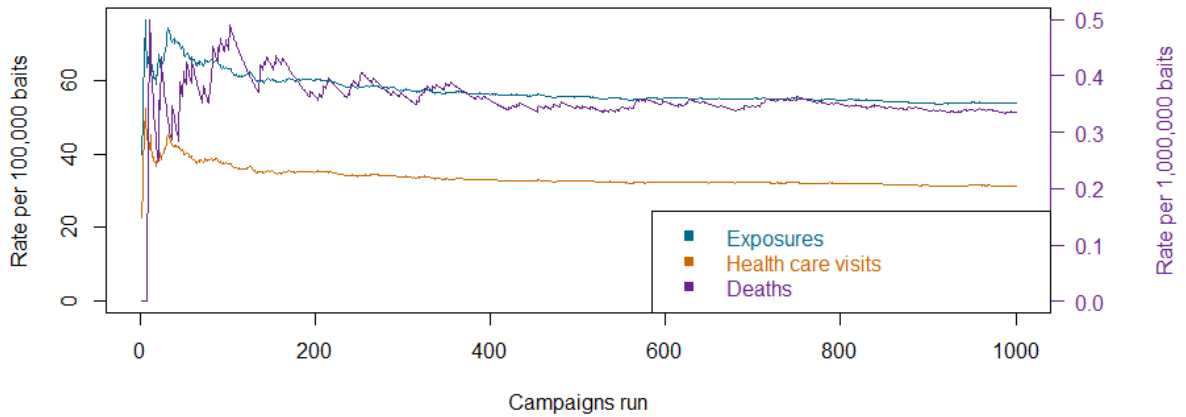

**SPBN GAGAS Stability analysis of rate of exposures, health care visits, and deaths**

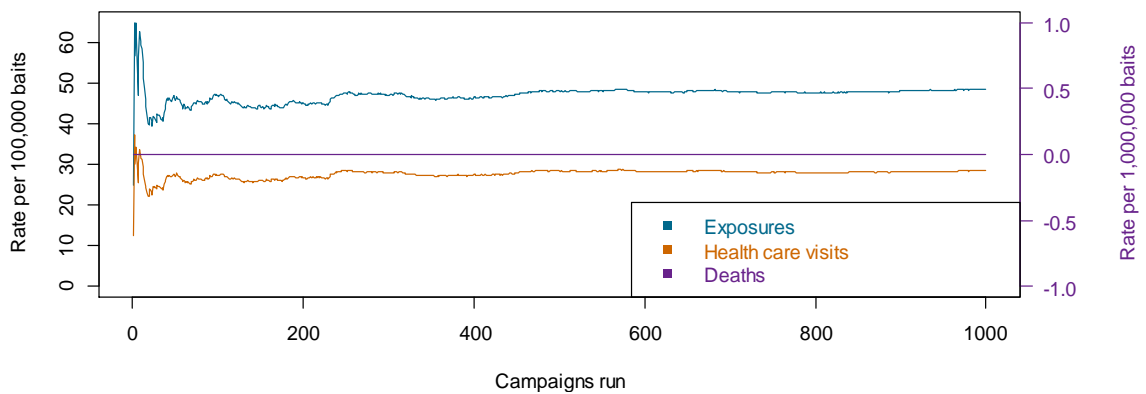

**Fig. S1. Stability analysis demonstrating changes in rate of outcomes measured per number of simulations run**

**Table S1. Mathematical equations describing rate of movement between each model compartment**

| #  | Rate Equation                                                                                                                         | Description                                | #  | Rate Equation                                                                                                           | Description                                             |
|----|---------------------------------------------------------------------------------------------------------------------------------------|--------------------------------------------|----|-------------------------------------------------------------------------------------------------------------------------|---------------------------------------------------------|
| 1  | $DiR \cdot P_{rec} \cdot (1 - (P_{swallow} \cdot P_{i,T} + P_{i,NT})), \text{ if } B > 0, 0 \text{ else}$                             | recovery of baits in environment           | 48 | $(1 - PC_L) \cdot P_{latent} \cdot PSAE_{M,nIC} \cdot H_{L,nIC}$                                                        | nIC with mucosal lick gets SAE                          |
| 2  | $P_{reuse} \cdot B_r$                                                                                                                 | reuse of recovered bait                    | 49 | $(1 - PC_B) \cdot P_{latent} \cdot PSAE_{T,nIC} \cdot H_{TB,nIC}$                                                       | nIC with transdermal bite gets SAE                      |
| 3  | $(1/DeR) \cdot (1 - P_{reuse}) \cdot B_r  _{\text{time, } t = DeR}, \text{ if } B_r > 0 \text{ \& time, } t \geq DeR, 0 \text{ else}$ | destruction of recovered bait              | 50 | $(1 - P_{SB}) \cdot P_{latent} \cdot PSAE_{P,nIC} \cdot H_{SB,nIC}$                                                     | nIC with severe bite gets SAE                           |
| 4  | $DiR \cdot (1 - P_{rec}) \cdot (1 - (P_{swallow} \cdot P_{i,T} + P_{i,NT})), \text{ if } B > 0, 0 \text{ else}$                       | bait left in environment                   | 51 | $(1 - PC_B) \cdot PSAE_{RB,nIC} \cdot H_{RB,nIC}$                                                                       | nIC gets SAE after rabid animal bite                    |
| 5  | $(1/DeR) \cdot B_v  _{\text{time, } t = DeR}, \text{ if } B_v > 0 \text{ \& time, } t \geq DeR, 0 \text{ else, } 0 \text{ else}$      | decay of left bait                         | 52 | $(1 - PC_{MC} - PSAE_{M,nIC}) \cdot H_{MC,nIC}$                                                                         | IC with mucosal contact avoids SAE w/o care             |
| 6  | $DiR \cdot P_{i,T}, \text{ if } B > 0, 0 \text{ else}$                                                                                | target ingests bait                        | 53 | $(1 - PC_{TC} - PSAE_{T,nIC}) \cdot H_{TC,nIC}$                                                                         | IC with transdermal contact avoids SAE w/o care         |
| 7  | $(1/RP) \cdot (1 - P_{RAB}) \cdot T_v  _{\text{time, } t = RP}, \text{ if } T_v > 0 \text{ \& time, } t \geq RP, 0 \text{ else}$      | target stops shedding in oral cavity       | 54 | $(1 - PC_L - (P_{latent} \cdot PSAE_{M,nIC})) \cdot H_{L,nIC}$                                                          | IC with mucosal lick avoids SAE w/o care                |
| 8  | $P_{RAB} \cdot T_{NV}$                                                                                                                | target becomes rabid                       | 55 | $(1 - PC_B - (P_{latent} \cdot PSAE_{T,nIC})) \cdot H_{TB,nIC}$                                                         | IC with transdermal bite avoids SAE w/o care            |
| 9  | $(1 - P_{RAB}) \cdot T_{NV}$                                                                                                          | target becomes seroconverts                | 56 | $(1 - PC_{SB} - (P_{latent} \cdot PSAE_{P,nIC})) \cdot H_{SB,nIC}$                                                      | IC with severe bite avoids SAE w/o care                 |
| 10 | $\delta_R \cdot T_R$                                                                                                                  | death of rabid target animal               | 57 | $(1 - PC_B - PSAE_{RB,nIC}) \cdot H_{RB,nIC}$                                                                           | IC bitten by rabid dog avoids SAE without care          |
| 11 | $DiR \cdot P_{i,NT}, \text{ if } B > 0, 0 \text{ else}$                                                                               | non-target ingests bait                    | 58 | $(1 - PC_{MC} - PSAE_{M,nIC}) \cdot H_{MC,nIC}$                                                                         | nIC with mucosal contact avoids SAE w/o care            |
| 12 | $(1/RP) \cdot (1 - P_{RAB}) \cdot NT_v  _{\text{time, } t = RP}, \text{ if } NT_v > 0 \text{ \& time, } t \geq RP, 0 \text{ else}$    | non-target stops shedding in oral cavity   | 59 | $(1 - PC_{TC} - PSAE_{T,nIC}) \cdot H_{TC,nIC}$                                                                         | nIC with transdermal contact avoids SAE w/o care        |
| 13 | $P_{RAB} \cdot NT_{NV}$                                                                                                               | non-target becomes rabid                   | 60 | $(1 - PC_L - (P_{latent} \cdot PSAE_{M,nIC})) \cdot H_{L,nIC}$                                                          | nIC with mucosal lick avoids SAE w/o care               |
| 14 | $(1 - P_{RAB}) \cdot NT_{NV}$                                                                                                         | non-target seroconverts                    | 61 | $(1 - P_{SB}) \cdot P_{latent} \cdot PSAE_{P,nIC} \cdot H_{SB,nIC}$                                                     | nIC with severe bite gets SAE                           |
| 15 | $\delta_R \cdot NT_R$                                                                                                                 | death of rabid non-target animal           | 62 | $(1 - PC_{SB} - (P_{latent} \cdot PSAE_{P,nIC})) \cdot H_{SB,nIC}$                                                      | nIC with severe bite avoids SAE w/o care                |
| 16 | $(1 - P_{nIC}) \cdot K \cdot P_{MC} \cdot B_v$                                                                                        | IC exposed mucosally (direct contact)      | 63 | $(1 - PC_B - PSAE_{RB,nIC}) \cdot H_{RB,nIC}$                                                                           | nIC bitten by rabid dog avoids SAE without care         |
| 17 | $(1 - P_{nIC}) \cdot K \cdot P_{TC} \cdot B_v$                                                                                        | IC exposed transdermally (direct contact)  | 64 | $\alpha \cdot PSAE_{M,nIC} \cdot H_{C,MC,nIC}$                                                                          | IC with mucosal contact gets SAE after seeking care     |
| 18 | $(1 - P_{nIC}) \cdot LR_T \cdot P_{MME} \cdot T_v + (1 - P_{nIC}) \cdot LR_{NT} \cdot P_{MME} \cdot NT_v$                             | IC exposed via lick on mucosal membranes   | 65 | $\alpha \cdot PSAE_{T,nIC} \cdot H_{C,TC,nIC}$                                                                          | IC with transdermal contact gets SAE after seeking care |
| 19 | $(1 - P_{nIC}) \cdot BR_T \cdot (1 - P_{SB}) \cdot T_v + (1 - P_{nIC}) \cdot BR_{NT} \cdot (1 - P_{SB}) \cdot NT_v$                   | IC exposed via transdermal bite            | 66 | $\alpha \cdot P_{latent} \cdot PSAE_{M,nIC} \cdot H_{C,L,nIC}$                                                          | IC with mucosal lick gets SAE after seeking care        |
| 20 | $(1 - P_{nIC}) \cdot BR_T \cdot P_{SB} \cdot T_v + (1 - P_{nIC}) \cdot BR_{NT} \cdot P_{SB} \cdot NT_v$                               | IC exposed via severe bite                 | 67 | $\alpha \cdot P_{latent} \cdot PSAE_{T,nIC} \cdot H_{C,TB,nIC}$                                                         | IC with transdermal bite gets SAE after seeking care    |
| 21 | $(1 - P_{nIC}) \cdot (RBR_T \cdot BR_{0,T} \cdot T_D + RBR_{NT} \cdot BR_{0,NT} \cdot NT_D)$                                          | IC bitten by vaccine-induced rabid animal  | 68 | $\alpha_p \cdot P_{latent} \cdot PSAE_{P,nIC} \cdot H_{C,SB,nIC}$                                                       | IC with severe bite gets SAE after seeking care         |
| 22 | $P_{nIC} \cdot K \cdot P_{MC} \cdot B_v$                                                                                              | nIC exposed mucosally (direct contact)     | 69 | $[(P_{SB} \cdot \alpha_p \cdot PSAE_{P,nIC}) + ((1 - P_{SB}) \cdot \alpha \cdot PSAE_{RB,nIC})] \cdot H_{C,RB,nIC}$     | IC with rabid bite gets SAE after seeking care          |
| 23 | $P_{nIC} \cdot K \cdot P_{TC} \cdot B_v$                                                                                              | nIC exposed transdermally (direct contact) | 70 | $\alpha \cdot PSAE_{M,nIC} \cdot H_{C,MC,nIC}$                                                                          | nIC with mucosal contact gets SAE after seeking care    |
| 24 | $P_{nIC} \cdot LR_T \cdot P_{MME} \cdot T_v + P_{nIC} \cdot LR_{NT} \cdot P_{MME} \cdot NT_v$                                         | nIC exposed via lick on mucosal membranes  | 71 | $\alpha \cdot PSAE_{T,nIC} \cdot H_{C,TC,nIC}$                                                                          | nIC with transdermal contact gets SAE after care        |
| 25 | $P_{nIC} \cdot BR_T \cdot (1 - P_{SB}) \cdot T_v + P_{nIC} \cdot BR_{NT} \cdot (1 - P_{SB}) \cdot NT_v$                               | nIC exposed via transdermal bite           | 72 | $\alpha \cdot P_{latent} \cdot PSAE_{M,nIC} \cdot H_{C,L,nIC}$                                                          | nIC with mucosal lick gets SAE after care               |
| 26 | $P_{nIC} \cdot BR_T \cdot P_{SB} \cdot T_v + P_{nIC} \cdot BR_{NT} \cdot P_{SB} \cdot NT_v$                                           | nIC exposed via severe bite                | 73 | $\alpha \cdot P_{latent} \cdot PSAE_{T,nIC} \cdot H_{C,TB,nIC}$                                                         | nIC with transdermal bite gets SAE after care           |
| 27 | $P_{nIC} \cdot (RBR_T \cdot BR_{0,T} \cdot T_D + RBR_{NT} \cdot BR_{0,NT} \cdot NT_D)$                                                | nIC bitten by vaccine-induced rabid animal | 74 | $\alpha_p \cdot P_{latent} \cdot PSAE_{P,nIC} \cdot H_{C,SB,nIC}$                                                       | nIC with severe bite gets SAE after seeking care        |
| 28 | $PC_{MC} \cdot H_{MC,nIC}$                                                                                                            | IC exposed mucosally gets care             | 75 | $[(P_{SB} \cdot \alpha_p \cdot PSAE_{P,nIC}) + ((1 - P_{SB}) \cdot \alpha \cdot PSAE_{RB,nIC})] \cdot H_{C,RB,nIC}$     | nIC with rabid bite gets SAE after seeking care         |
| 29 | $PC_{TC} \cdot H_{TC,nIC}$                                                                                                            | IC exposed transdermally gets care         | 76 | $(1 - \alpha \cdot PSAE_{M,nIC}) \cdot H_{C,MC,nIC}$                                                                    | IC with mucosal contact seeks care and avoids SAE       |
| 30 | $PC_L \cdot H_{L,nIC}$                                                                                                                | IC with mucosal lick gets care             | 77 | $(1 - \alpha \cdot PSAE_{T,nIC}) \cdot H_{C,TC,nIC}$                                                                    | IC with transdermal contact seeks care and avoids SAE   |
| 31 | $PC_B \cdot H_{TB,nIC}$                                                                                                               | IC with transdermal bite gets care         | 78 | $(1 - \alpha \cdot PSAE_{M,nIC}) \cdot H_{C,L,nIC}$                                                                     | IC with mucosal lick seeks care and avoids SAE          |
| 32 | $PC_{SB} \cdot H_{SB,nIC}$                                                                                                            | IC with severe bite gets care              | 79 | $(1 - \alpha \cdot PSAE_{T,nIC}) \cdot H_{C,TB,nIC}$                                                                    | IC with transdermal bite seeks care and avoids SAE      |
| 33 | $PC_B \cdot H_{RB,nIC}$                                                                                                               | IC with rabid animal bite gets care        | 80 | $(1 - \alpha_p \cdot PSAE_{P,nIC}) \cdot H_{C,SB,nIC}$                                                                  | IC with severe bite seeks care and avoids SAE           |
| 34 | $PC_{MC} \cdot H_{MC,nIC}$                                                                                                            | nIC exposed mucosally gets care            | 81 | $[(1 - (P_{SB} \cdot \alpha_p \cdot PSAE_{P,nIC} + (1 - P_{SB}) \cdot \alpha \cdot PSAE_{RB,nIC})) \cdot H_{C,RB,nIC}]$ | IC with rabid bite seeks care and avoids SAE            |
| 35 | $PC_{TC} \cdot H_{TC,nIC}$                                                                                                            | nIC exposed transdermally gets care        | 82 | $(1 - \alpha \cdot PSAE_{M,nIC}) \cdot H_{C,MC,nIC}$                                                                    | nIC with mucosal contact seeks care and avoids SAE      |
| 36 | $PC_L \cdot H_{L,nIC}$                                                                                                                | nIC with mucosal lick gets care            | 83 | $(1 - \alpha \cdot PSAE_{T,nIC}) \cdot H_{C,TC,nIC}$                                                                    | nIC with transdermal contact seeks care and avoids SAE  |
| 37 | $PC_B \cdot H_{TB,nIC}$                                                                                                               | nIC with transdermal bite gets care        | 84 | $(1 - \alpha \cdot PSAE_{M,nIC}) \cdot H_{C,L,nIC}$                                                                     | nIC with mucosal lick seeks care and avoids SAE         |
| 38 | $PC_{SB} \cdot H_{SB,nIC}$                                                                                                            | nIC with severe bite gets care             | 85 | $(1 - \alpha \cdot PSAE_{T,nIC}) \cdot H_{C,TB,nIC}$                                                                    | nIC with transdermal bite seeks care and avoids SAE     |
|    |                                                                                                                                       |                                            | 86 | $(1 - \alpha_p \cdot PSAE_{P,nIC}) \cdot H_{C,SB,nIC}$                                                                  | nIC with severe bite seeks care and avoids SAE          |
|    |                                                                                                                                       |                                            | 87 | $[(1 - (P_{SB} \cdot \alpha_p \cdot PSAE_{P,nIC} + (1 - P_{SB}) \cdot \alpha \cdot PSAE_{RB,nIC})) \cdot H_{C,RB,nIC}]$ | nIC with rabid bite seeks care and avoids SAE           |
|    |                                                                                                                                       |                                            | 88 | $PC_{SAE} \cdot H_{SAE,nIC}$                                                                                            | IC with SAE seeks care                                  |
|    |                                                                                                                                       |                                            | 89 | $PC_{SAE} \cdot H_{SAE,nIC}$                                                                                            | nIC with SAE seeks care                                 |

|    |                                                                     |                                       |    |                                       |                                       |
|----|---------------------------------------------------------------------|---------------------------------------|----|---------------------------------------|---------------------------------------|
| 39 | $PC_B \bullet HR_{B,nIC}$                                           | nIC with rabid animal bite gets care  | 90 | $Y_{SAE,IC} \bullet H_{SAE,IC}$       | IC with SAE recovers w/o care         |
| 40 | $(1-PC_{MC}) \bullet PSAEM_{,IC} \bullet H_{MC,IC}$                 | IC with mucosal contact gets SAE      | 91 | $Y_{SAE,nIC} \bullet H_{SAE,nIC}$     | nIC with SAE recovers w/o care        |
| 41 | $(1-PC_{TC}) \bullet PSAET_{,IC} \bullet H_{TC,IC}$                 | IC with transdermal contact gets SAE  | 92 | $Y_{C,IC} \bullet H_{C,SAE,IC}$       | IC with SAE recovers after care       |
| 42 | $(1-PC_i) \bullet P_{latent} \bullet PSAEM_{,IC} \bullet H_{L,IC}$  | IC with mucosal lick gets SAE         | 93 | $Y_{C,nIC} \bullet H_{C,SAE,nIC}$     | nIC with SAE recovers after care      |
| 43 | $(1-PC_B) \bullet P_{latent} \bullet PSAET_{,IC} \bullet H_{TB,IC}$ | IC with transdermal bite gets SAE     | 94 | $(1-Y_{SAE,IC}) \bullet H_{SAE,IC}$   | IC with SAE dies w/o additional care  |
| 44 | $(1-PS_B) \bullet P_{latent} \bullet PSAEP_{,IC} \bullet H_{SB,IC}$ | IC with severe bite gets SAE          | 95 | $(1-Y_{SAE,nIC}) \bullet H_{SAE,nIC}$ | nIC with SAE dies w/o additional care |
| 45 | $(1-PC_B) \bullet PSAER_{B,IC} \bullet HR_{B,IC}$                   | IC gets SAE after rabid animal bite   | 96 | $(1-Y_{C,IE}) \bullet H_{C,SAE,IC}$   | IC with SAE dies after care           |
| 46 | $(1-PC_{MC}) \bullet PSAEM_{,nIC} \bullet H_{MC,nIC}$               | nIC with mucosal contact gets SAE     | 97 | $(1-Y_{C,nIE}) \bullet H_{C,SAE,nIC}$ | nIC with SAE dies after care          |
| 47 | $(1-PC_{TC}) \bullet PSAET_{,nIC} \bullet H_{TC,nIC}$               | nIC with transdermal contact gets SAE |    |                                       |                                       |

IC = immune competent

nIC = not immune competent (immune compromised)

**Table S2. Parameter values for each parameter in Table SA1, along with justification for values used in the oral rabies vaccination comparison**

| Parameter     | Description                                                               | Value (Range)                    |                               |                               | Source/Justification                                                                                                                                                                                                                                                                     |
|---------------|---------------------------------------------------------------------------|----------------------------------|-------------------------------|-------------------------------|------------------------------------------------------------------------------------------------------------------------------------------------------------------------------------------------------------------------------------------------------------------------------------------|
|               |                                                                           | SAD B19 in foxes                 | SAD B19 in dogs               | SPBN GASGAS in dogs           |                                                                                                                                                                                                                                                                                          |
| $P_{IC}$      | Proportion of immuno-compromised individuals                              | 4.814E-3 (4.094E-3, 2.728E-2)    | 4.814E-3 (4.094E-3, 2.728E-2) | 4.814E-3 (4.094E-3, 2.728E-2) | Based on the number of persons living with HIV <sup>1</sup> and depressed CD4 count <sup>2,3</sup> , primary immune deficiency disorder <sup>4</sup> , or blood cancers <sup>5</sup> ; Sensitivity analysis considers HIV rate in South Africa and Europe                                |
| $P_{Vax}$     | Proportion of people vaccinated against disease                           | 0 (fixed)                        | 0 (fixed)                     | 0 (fixed)                     | Most conservative estimate; Varies geographically                                                                                                                                                                                                                                        |
| $H_S$         | Total human population                                                    | 4,400,000 (fixed)                | 4,400,000 (fixed)             | 4,400,000 (fixed)             | Based on a global average human to dog ratio of 11:1 <sup>6</sup> ; Varies geographically                                                                                                                                                                                                |
| $B_0$         | Total amount of bait                                                      | 400,000 (fixed)                  | 400,000 (fixed)               | 400,000 (fixed)               | 20% of total dog population are "inaccessible" dogs                                                                                                                                                                                                                                      |
| $DiR$         | Daily distribution rate of baits                                          | 6,667 (fixed)                    | 6,667 (fixed)                 | 6,667 (fixed)                 | 400,000 baits over 60 day campaign                                                                                                                                                                                                                                                       |
| $P_{rec}$     | Proportion of non-ingested baits recovered from environment               | 0 (fixed)                        | 0.263 (0.10 – 0.51)           | 0.263 (0.10 – 0.51)           | DOG: Campaign results from Haiti <sup>7</sup> ; Sensitivity analysis is 95% confidence interval around the proportion                                                                                                                                                                    |
| $P_{reuse}$   | Proportion of baits reused after recovery                                 | N/A                              | 0.50 (fixed)                  | 0.50 (fixed)                  | Expert opinion                                                                                                                                                                                                                                                                           |
| $DeR$         | Number of days vaccine is viable in environment                           | 10.0 (3, 30)                     | 10.0 (3, 30)                  | 10.0 (3, 30)                  | Laboratory field tests <sup>8</sup>                                                                                                                                                                                                                                                      |
| $P_{I,T}$     | Proportion of baits ingested (punctured or swallowed) by target animal    | 0.20 (0.10, 0.30)                | 0.931 (0.89, 0.96)            | 0.931 (0.89, 0.96)            | Results from previous campaigns <sup>7,9-16</sup> . Sensitivity analysis is 95% confidence interval around the proportion                                                                                                                                                                |
| $P_{SWALLOW}$ | Among those baits ingested, proportion of fully swallowed                 | 1 (fixed)                        | 1 (fixed)                     | 1 (fixed)                     | Held to isolate effect of animal consumption in this model                                                                                                                                                                                                                               |
| $P_{I,NT}$    | Proportion of baits ingested by non-target animal                         | 0.55 (0.40, 0.70)                | 3.436E-3 (2.0E-4, 2.2E-2)     | 3.436E-3 (2.0E-4, 2.2E-2)     | Results from previous campaigns <sup>7,9-16</sup> . Sensitivity analysis is 95% confidence interval around the proportion                                                                                                                                                                |
| $K$           | Daily human contact rate with the bait in the environment                 | 4.847E-5 (2.891E-6, 7.358E-5)    | 1.107E-4 (6.6E-6, 1.68E-4)    | 1.107E-4 (6.6E-6, 1.68E-4)    | DOG: Center and range drawn from data on calls about exposure from multistate ORV surveillance systems <sup>17</sup> and results of wildlife campaign in Ohio <sup>18</sup> . FOX: multiplied dog values by an adjustment factor to account for less dense applications <sup>19-22</sup> |
| $P_{MC}$      | Probability the contact event results in mucosal inoculation              | 0.0714 (0.013, 0.31)             | 0.0714 (0.013, 0.31)          | 0.0714 (0.013, 0.31)          | Results of exposure types from wildlife campaign in Ohio <sup>18</sup> ; Sensitivity analysis is 95% confidence interval around proportion.                                                                                                                                              |
| $P_{TC}$      | Probability the contact event results in transdermal inoculation          | 0.071 (0.013, 0.31)              | 0.071 (0.013, 0.31)           | 0.071 (0.013, 0.31)           | Results of exposure types from wildlife campaign in Ohio <sup>18</sup> ; Sensitivity analysis is 95% confidence interval around proportion.                                                                                                                                              |
| $LR_T$        | Daily probability of being licked by an animal from the target population | 5.480E-12 (2.736E-12, 8.208E-12) | 4.110E-4 (2.055E-4, 6.164E-4) | 4.110E-4 (2.055E-4, 6.164E-4) | FOX: Based on bite rate and rare event justification; Sensitivity analysis ( $\pm 50\%$ of estimate).                                                                                                                                                                                    |

|                       |                                                                                                                  |                                  |                               |                               |                                                                                                                                                                                                                                                            |
|-----------------------|------------------------------------------------------------------------------------------------------------------|----------------------------------|-------------------------------|-------------------------------|------------------------------------------------------------------------------------------------------------------------------------------------------------------------------------------------------------------------------------------------------------|
|                       |                                                                                                                  |                                  |                               |                               | DOG: Based on expert opinion from prevalence of dog ownership <sup>23</sup> and bite rate in Haiti <sup>24</sup> ; Sensitivity analysis ( $\pm 50\%$ of estimate).                                                                                         |
| LR <sub>NT</sub>      | Daily probability of being licked by an animal from the non-target population                                    | 3.726E-5 (1.863E-5, 5.589E-5)    | 4.110E-6 (1.027E-6, 9.247E-6) | 4.110E-6 (1.027E-6, 9.247E-6) | FOX: Based on weighted average of lick rate for dogs and wild animals; Sensitivity analysis ( $\pm 50\%$ of estimate).<br>DOG: Assumed 1% of target population; Sensitivity analysis ( $\pm 50\%$ of estimate).                                            |
| RP                    | Days vaccine stays in oral cavity                                                                                | 0.5 (0.167, 1)                   | 0.5 (0.167, 1)                | 0.5 (0.167, 1)                | Shedding studies (Supplemental Table 2) <sup>25</sup>                                                                                                                                                                                                      |
| P <sub>MME</sub>      | Probability of mucous membrane or wound exposure to saliva                                                       | 6.667E-4 (6.667E-6, 6.667E-3)    | 6.667E-4 (6.667E-6, 6.667E-3) | 6.667E-4 (6.667E-6, 6.667E-3) | Considered rare event                                                                                                                                                                                                                                      |
| BR <sub>T</sub>       | Daily bite rate of target population                                                                             | 8.219E-8 (4.110E-8, 1.233E-7)    | 8.219E-5 (4.110E-5, 1.233E-4) | 8.219E-5 (4.110E-5, 1.233E-4) | DOG: Household survey in Haiti <sup>24</sup> ; Sensitivity analysis ( $\pm 50\%$ of estimate).<br>FOX: Adjustment from dog bite rate based on percent of rabid bites attributable to foxes <sup>26</sup> ; Sensitivity analysis ( $\pm 50\%$ of estimate). |
| BR <sub>NT</sub>      | Daily bite rate of non-target population                                                                         | 8.151E-06 (4.075E-06, 1.223E-05) | 9.863E-6 (2.466E-6, 2.219E-5) | 9.863E-6 (2.466E-6, 2.219E-5) | FOX: Based on weighted average of lick rate for dogs and wild animals <sup>26</sup> ; Sensitivity analysis ( $\pm 50\%$ of estimate).<br>DOG: Based on bite data from Los Angeles, CA <sup>27</sup> ; Sensitivity analysis ( $\pm 50\%$ of estimate).      |
| P <sub>SB</sub>       | Proportion of animal bites with cranial or peritoneal inoculation                                                | 5.60E-5 (2.80E-5, 1.68E-4)       | 5.60E-5 (2.80E-5, 1.68E-4)    | 5.60E-5 (2.80E-5, 1.68E-4)    | Based on data from Los Angeles, CA regarding percentages of bites that resulted in hospitalization and to the face <sup>27</sup> and data from Paris on face bites that break the bone <sup>28</sup> ; Sensitivity analysis ( $\pm 50\%$ of estimate).     |
| P <sub>RAB</sub>      | Proportion of animals that develop vaccine induced rabies                                                        | 2.360E-6 (2.360E-7, 2.360E-5)    | 4.332E-6 (4.332E-7, 4.332E-5) | 0 (fixed)                     | FOX: Results of ORV campaigns in foxes <sup>13</sup><br>DOG: Adjustment from 6/277 million to account for underreporting; Sensitivity analysis (factor of 10 above and below estimate).                                                                    |
| $\delta_R$            | Death rate of rabid animal                                                                                       | 7.14E-2 (3.5E-2, 1.07)           | 7.14E-2 (3.5E-2, 1.07)        | N/A                           | Death rate of rabid animals <sup>29</sup> ; Sensitivity analysis ( $\pm 50\%$ of estimate).                                                                                                                                                                |
| RBR <sub>T</sub>      | Percent of rabid target animals that bite another human                                                          | 3.653E-6                         | 0.5 (0.25, 0.75)              | 0.5 (0.25, 0.75)              | Expert opinion; Sensitivity analysis ( $\pm 50\%$ of estimate).                                                                                                                                                                                            |
| RBR <sub>NT</sub>     | Percent of rabid non-target animals that bite another human                                                      | 4.5E-2 (2.0E-2, 7.5E-2)          | 3.653E-6 (3.653E-7, 3.653E-5) | 3.653E-6 (3.653E-7, 3.653E-5) | Expert opinion; Sensitivity analysis (factor of 10 above and below estimate).                                                                                                                                                                              |
| BR <sub>0,T</sub>     | Daily bite rate of rabid target animals (among those that bite)                                                  | 7.14E-2 (3.5E-2, 1.07)           | 1.429E-1 (7.14E-2, 2.143E-1)  | 1.429E-1 (7.14E-2, 2.143E-1)  | Expert opinion; Sensitivity analysis ( $\pm 50\%$ of estimate).                                                                                                                                                                                            |
| BR <sub>0,NT</sub>    | Daily bite rate of rabid non-target animals (among those that bite)                                              | 7.793E-2 (3.896E-2, 1.169E-1)    | 7.14E-2 (3.5E-2, 1.07)        | 7.14E-2 (3.5E-2, 1.07)        | Expert opinion; Sensitivity analysis ( $\pm 50\%$ of estimate).                                                                                                                                                                                            |
| PSAE <sub>M,IC</sub>  | Probability of a severe adverse event if mucous membranes are exposed to vaccine in an immune competent person   | 7.4E-3 (3.15E-3, 5.5E-1)         | 7.4E-3 (3.15E-3, 5.5E-1)      | 9.0E-5 (9.0E-7, 9.0E-3)       | Mouse challenge studies (SAD-B19: Supplemental Table 3; SPBN GASGAS: Supplemental Table 4) <sup>30</sup>                                                                                                                                                   |
| PSAE <sub>M,NIC</sub> | Probability of a severe adverse event if mucous membranes are exposed to vaccine in an immune compromised person | 4.84E-2 (2.1E-3, 1.7E-1)         | 4.84E-2 (2.1E-3, 1.7E-1)      | 3.78E-2 (1.1E-2, 3.78E-1)     | Mouse challenge studies (SAD-B19: Supplemental Table 3; SPBN GASGAS: Supplemental Table 4) <sup>30</sup>                                                                                                                                                   |

|                        |                                                                                                                      |                           |                           |                            |                                                                                                                                 |
|------------------------|----------------------------------------------------------------------------------------------------------------------|---------------------------|---------------------------|----------------------------|---------------------------------------------------------------------------------------------------------------------------------|
| PSAE <sub>T,IC</sub>   | Probability of a severe adverse event with transdermal exposure to vaccine in an immune competent person             | 2.9E-3 (1.0E-5, 5.0E-2)   | 2.9E-3 (1.0E-5, 5.0E-2)   | 9.0E-5 (9.0E-7, 9.0E-3)    | Mouse challenge studies (SAD-B19: Supplemental Table 3; SPBN GASGAS: Supplemental Table 4) <sup>30</sup>                        |
| PSAE <sub>T,nIC</sub>  | Probability of a severe adverse event with transdermal exposure to vaccine in an immune compromised person           | 9.98E-2 (6.15E-2, 9.2E-1) | 9.98E-2 (6.15E-2, 9.2E-1) | 1.42E-2 (1.42E-3, 1.42E-1) | Mouse challenge studies (SAD-B19: Supplemental Table 3; SPBN GASGAS: Supplemental Table 4) <sup>30</sup>                        |
| PSAE <sub>P,IC</sub>   | Probability of a severe adverse event with peritoneal or cranial exposure to vaccine in an immune competent person   | 9.99E-3 (7.51E-3, 9.5E-1) | 9.99E-3 (7.51E-3, 9.5E-1) | 9.0E-5 (9.0E-7, 9.0E-3)    | Mouse challenge studies (SAD-B19: Supplemental Table 3; SPBN GASGAS: Supplemental Table 4) <sup>30</sup>                        |
| PSAE <sub>P,nIC</sub>  | Probability of a severe adverse event with peritoneal or cranial exposure to vaccine in an immune compromised person | 1E-1 (8.32E-2, 1.0)       | 1E-1 (8.32E-2, 1.0)       | 7.79E-2 (7.79E-1, 3.66E-2) | Mouse challenge studies (SAD-B19: Supplemental Table 3; SPBN GASGAS: Supplemental Table 4) <sup>30</sup>                        |
| PSAE <sub>RB,IC</sub>  | Probability of a severe adverse event with following a bite from a rabid animal in an immune competent person        | 0.18 (0.09, 0.27)         | 0.18 (0.09, 0.27)         | 0.18 (0.09, 0.27)          | Report <sup>31</sup> ; Sensitivity analysis ( $\pm$ 50% of estimate).                                                           |
| PSAE <sub>RB,nIC</sub> | Probability of a severe adverse event with following a bite from a rabid animal in an immune compromised person      | 0.36 (0.18, 0.54)         | 0.36 (0.18, 0.54)         | 0.36 (0.18, 0.54)          | Twice that for immune competent individuals (expert opinion).                                                                   |
| P <sub>latent</sub>    | Probability animal had latent immune response                                                                        | 0.20 (0.10- 0.30)         | 0.20 (0.10- 0.30)         | 0.20 (0.10- 0.30)          | Shedding studies (Supplemental Table 2) <sup>25</sup>                                                                           |
| PC <sub>MC</sub>       | Probability an exposed person sought care after mucosal contact with vaccine                                         | 0.43 (0.05, 0.64)         | 0.43 (0.05, 0.64)         | 0.43 (0.05, 0.64)          | Household survey on health-care seeking behavior in Haiti <sup>32</sup> ; Sensitivity analysis based on before and after values |
| TC <sub>TC</sub>       | Probability an exposed person sought care after transdermal contact with vaccine                                     | 0.43 (0.05, 0.64)         | 0.43 (0.05, 0.64)         | 0.43 (0.05, 0.64)          | Household survey on health-care seeking behavior in Haiti <sup>32</sup> ; Sensitivity analysis based on before and after values |
| PC <sub>L</sub>        | Probability an exposed person sought care after licked on a mucosal membrane or fresh wound                          | 0.44 (0.11, 0.80)         | 0.44 (0.11, 0.80)         | 0.44 (0.11, 0.80)          | Household survey on health-care seeking behavior in Haiti <sup>32</sup> ; Sensitivity analysis based on before and after values |
| PC <sub>B</sub>        | Probability an exposed person sought care after bite                                                                 | 0.60 (0.44, 0.99)         | 0.60 (0.44, 0.99)         | 0.60 (0.44, 0.99)          | Household survey on health-care seeking behavior in Haiti <sup>32</sup> ; Sensitivity analysis based on before and after values |
| PC <sub>SB</sub>       | Probability an exposed person sought care after severe bite resulting in cranial or peritoneal inoculation           | 0.90 (0.44, 0.99)         | 0.90 (0.44, 0.99)         | 0.90 (0.44, 0.99)          | Household survey on health-care seeking behavior in Haiti <sup>32</sup> ; Sensitivity analysis based on before and after values |
| PC <sub>SAE</sub>      | Probability a person with an SAE seeks care                                                                          | 0                         | 0                         | 0                          | For rabies only: assumed a person with an SAE dies                                                                              |
| $\alpha$               | Probability of SAE after care is given, for a non cranial or peritoneal inoculation                                  | 0                         | 0                         | 0                          | For rabies only: assumed PEP is 100% effective if administered                                                                  |



|                       |                                                                                 |                   |                   |                   |                                                    |
|-----------------------|---------------------------------------------------------------------------------|-------------------|-------------------|-------------------|----------------------------------------------------|
| $\alpha_P$            | Probability of SAE after care is given, for a cranial or peritoneal inoculation | 0.70 (0.60, 0.80) | 0.70 (0.60, 0.80) | 0.70 (0.60, 0.80) | Expert opinion; sensitivity analysis $\pm$ 10%     |
| $\gamma_{SAE,IC/nIC}$ | Probability of recovery in persons with an SAE who don't seek care              | 0                 | 0                 | 0                 | For rabies only: assumed a person with an SAE dies |
| $\gamma_{SAE,IC/nIC}$ | Probability of recovery in persons with an SAE after seeking care               | 0                 | 0                 | 0                 | For rabies only: assumed a person with an SAE dies |

**Table S3. Experimental data on shedding (saliva) studies with SPBN GASGAS <sup>25</sup>. All samples examined were pre-screened with PCR, and only PCR-positive samples were examined by RTCIT (hr – hours after vaccine administration).**

| <b>Hours after exposure</b> | <b>Number of animals examined</b> | <b>Number of animals with rabies virus detected in saliva</b> |
|-----------------------------|-----------------------------------|---------------------------------------------------------------|
| <b>1</b>                    | 24                                | 4                                                             |
| <b>2</b>                    | 104                               | 13                                                            |
| <b>4</b>                    | 105                               | 21                                                            |
| <b>24</b>                   | 168                               | 0                                                             |
| <b>48</b>                   | 163                               | 0                                                             |
| <b>72</b>                   | 147                               | 0                                                             |
| <b>120</b>                  | 32                                | 0                                                             |
| <b>168</b>                  | 62                                | 0                                                             |
| <b>240</b>                  | 35                                | 0                                                             |
| <b>336</b>                  | 42                                | 0                                                             |

**Table S4. Laboratory results of mice safety studies with SAD-B19 and associated model parameter choices**

| Type of exposure to vaccine:                                           | # mice exposure | # deaths | % of mice who died | Lower confidence Interval* | Lower confidence Interval* | Model lower bound | Model central bound | Model upper bound |
|------------------------------------------------------------------------|-----------------|----------|--------------------|----------------------------|----------------------------|-------------------|---------------------|-------------------|
| <b>Immune competent mice:</b>                                          |                 |          |                    |                            |                            |                   |                     |                   |
| mucosal membrane                                                       | 20              | 11       | 0.55               | 0.32                       | 0.754                      | 0.00315           | 0.00754             | 0.55              |
| transdermal                                                            | 20              | 1        | 0.05               | 0.00                       | 0.249                      | 0.00001           | 0.00249             | 0.05              |
| peritoneal or cranial                                                  | 30              | 29       | 0.97               | 0.75                       | 0.999                      | 0.00751           | 0.00999             | 0.95              |
| <b>Immune compromised or not yet immune competent (suckling) mice:</b> |                 |          |                    |                            |                            |                   |                     |                   |
| mucosal membrane                                                       | 12              | 2        | 0.17               | 0.02                       | 0.484                      | 0.0021            | 0.0484              | 0.17              |
| transdermal                                                            | 12              | 11       | 0.92               | 0.62                       | 0.998                      | 0.0615            | 0.0998              | 0.92              |
| peritoneal or cranial                                                  | 20              | 20       | 1.00               | 0.83                       | 1                          | 0.0832            | 0.1                 | 1                 |

\*Determined using fisher's exact test

**Table S5. Results of mice safety studies with SPBN GASGAS and associated model parameter choices**

| Type of exposure to vaccine:                                           | # mice exposed | # deaths | % of mice who died | Lower confidence Interval* | Lower confidence Interval* | Model lower bound | Model central bound | Model upper bound |
|------------------------------------------------------------------------|----------------|----------|--------------------|----------------------------|----------------------------|-------------------|---------------------|-------------------|
| <b>Immune competent mice:</b>                                          |                |          |                    |                            |                            |                   |                     |                   |
| mucosal membrane                                                       | 20             | 0        | 0.00               | 0.00                       | 0.168                      | 0                 | 0.00009             | 0.009             |
| transdermal                                                            | 87             | 0        | 0.00               | 0.00                       | 0.041                      | 0                 | 0.00009             | 0.009             |
| peritoneal or cranial                                                  | 418            | 0        | 0.00               | 0.00                       | 0.009                      | 0                 | 0.00009             | 0.009             |
| <b>Immune compromised or not yet immune competent (suckling) mice:</b> |                |          |                    |                            |                            |                   |                     |                   |
| mucosal membrane                                                       | 44             | 10       | 0.23               | 0.11                       | 0.378                      | 0.011             | 0.0378              | 0.378             |
| transdermal                                                            | 24             | 0        | 0.00               | 0.00                       | 0.142                      | 0                 | 0.0142              | 0.142             |
| peritoneal or cranial                                                  | 24             | 14       | 0.58               | 0.37                       | 0.779                      | 0.0366            | 0.0779              | 0.779             |

\*Determined using fisher's exact test

## References

- 1 Fetting, J., Swaminathan, M., Murrill, C. S. & Kaplan, J. E. Global Epidemiology of HIV. *Infectious disease clinics of North America* **28**, 323-337, doi:10.1016/j.idc.2014.05.001 (2014).
- 2 Kranzer, K., Lawn, S. D., Johnson, L. F., Bekker, L.-G. & Wood, R. Community viral load and CD4 count distribution among people living with HIV in a South African township: implications for treatment as prevention. *Journal of acquired immune deficiency syndromes (1999)* **63**, 498-505, doi:10.1097/QAI.0b013e318293ae48 (2013).
- 3 Malaza, A., Mossong, J., Bärnighausen, T., Viljoen, J. & Newell, M.-L. Population-Based CD4 Counts in a Rural Area in South Africa with High HIV Prevalence and High Antiretroviral Treatment Coverage. *PloS one* **8**, e70126, doi:10.1371/journal.pone.0070126 (2013).
- 4 Kobrynski, L., Powell, R. W. & Bowen, S. Prevalence and morbidity of primary immunodeficiency diseases, United States 2001-2007. *Journal of clinical immunology* **34**, 954-961, doi:10.1007/s10875-014-0102-8 (2014).
- 5 Leukemia and Lymphoma Society. *Facts and statistics*, <<http://www.lls.org/facts-and-statistics/>> (2018).
- 6 Wallace, R. M., Undurraga, E. A., Blanton, J. D., Cleaton, J. & Franka, R. Elimination of Dog-Mediated Human Rabies Deaths by 2030: Needs Assessment and Alternatives for Progress Based on Dog Vaccination. *Frontiers in veterinary science* **4**, 9, doi:10.3389/fvets.2017.00009 (2017).
- 7 Smith, T. G. *et al.* Evaluation of immune responses in dogs to oral rabies vaccine under field conditions. *Vaccine*, doi:<https://doi.org/10.1016/j.vaccine.2017.09.096> (2017).
- 8 Vos, A. & Neubert, A. Thermo-stability of the oral rabies virus vaccines SAD B19 and SAD P5/88. *DTW. Deutsche tierärztliche Wochenschrift* **109**, 428-432 (2002).
- 9 Steelman, H. G., Henke, S. E. & Moore, G. M. Bait delivery for oral rabies vaccine to gray foxes. *Journal of wildlife diseases* **36**, 744-751, doi:10.7589/0090-3558-36.4.744 (2000).
- 10 Brochier, B. *et al.* *A field trial in Belgium to control fox rabies by oral immunisation*. Vol. 123 (1989).
- 11 Wandeler, A. I., Pfothenhauer, P. & Stocker, C. Über die Verwendung von Ködern zu biologischen Untersuchungen an Füchsen. *Revue suisse Zool* **82**, 335-348 (1975).
- 12 Paquot, A., Brochier, B., Thomas, I. & Pastoret, P. P. Campagnes de vaccination antirabique du renard roux (*vulpes vulpes*) menées en Belgique: mise en evidence de l'ingestion d'appâts vaccinaux par le cerf rouge (*Cervus elaphus*), le chevreuil (*Capreolus capreolus*) et le sanglier (*Sus scrofa*). *Ann Med Vet* **132**, 697-702 (1988).
- 13 Müller, T. *et al.* Analysis of vaccine-virus-associated rabies cases in red foxes (*Vulpes vulpes*) after oral rabies vaccination campaigns in Germany and Austria. *Archives of virology* **154**, 1081-1091, doi:10.1007/s00705-009-0408-7 (2009).
- 14 Müller, T. *et al.* Testung eines neuen Köders für die orale Immunisierung des Rotfuchses (*Vulpes vulpes*) gegen Tollwut Berl. *Munch. Tierarztl. Wochenschr.* **106**, 41-46 (1993).
- 15 Dedek, J., Loepelmann, H., Loepelmann, F., Kühne, L. & Rex, M. Praxisbericht über den Nachweis von Oxytetracyclin in Knochenspänen von Wildtieren mittels Fluoreszenzmikroskopie. *Monatsh. Veterinarmed.* **46**, 8-10 (1991).
- 16 Stöhr, K., Stöhr, P. & Müller, T. Orale Fuchsimpfung gegen Tollwut - Ergebnisse und Erfahrungen aus den ostdeutschen Bundesländern. *Tierarztl. Umsch.* **4**, 203-211 (1994).

- 17 Roess, A. A. *et al.* National surveillance for human and pet contact with oral rabies vaccine baits, 2001-2009. *Journal of the American Veterinary Medical Association* **240**, 163-168, doi:10.2460/javma.240.2.163 (2012).
- 18 Kellog, F. *et al.* Human contacts with oral rabies vaccine baits distributed for wildlife rabies management - Ohio, 2012. *Morbidity and Mortality Weekly Report* **62**, 267-269 (2013).
- 19 Müller, T. F., Schröder, R., Wysocki, P., Mettenleiter, T. C. & Freuling, C. M. Spatio-temporal Use of Oral Rabies Vaccines in Fox Rabies Elimination Programmes in Europe. *PLOS Neglected Tropical Diseases* **9**, e0003953, doi:10.1371/journal.pntd.0003953 (2015).
- 20 Freuling, C. M. *et al.* Efficacy of the oral rabies virus vaccine strain SPBN GASGAS in foxes and raccoon dogs. *Vaccine*, doi:<https://doi.org/10.1016/j.vaccine.2017.09.093> (2017).
- 21 Update on oral vaccination of foxes and raccoon dogs against rabies. *EFSA Journal* **13**, 4164, doi:doi:10.2903/j.efsa.2015.4164 (2015).
- 22 European Commission. The oral vaccination of foxes against rabies. *Report of the Scientific Committee on Animal Health and Animal Welfare* (2002).
- 23 Fielding, W. J., Gall, M., Green, D. & Eller, W. S. Care of Dogs and Attitudes of Dog Owners in Port-au-Prince, the Republic of Haiti. *Journal of Applied Animal Welfare Science* **15**, 236-253, doi:10.1080/10888705.2012.683760 (2012).
- 24 Schildecker, S. *et al.* Dog Ecology and Barriers to Canine Rabies Control in the Republic of Haiti, 2014-2015. *Transboundary and emerging diseases* **64**, 1433-1442, doi:10.1111/tbed.12531 (2017).
- 25 Vos, A. *et al.* An assessment of shedding with the oral rabies virus vaccine strain SPBN GASGAS in target and non-target species. *Vaccine* **36**, 811-817, doi:<https://doi.org/10.1016/j.vaccine.2017.12.076> (2018).
- 26 Babazadeh, T. *et al.* Epidemiology of acute animal bite and the direct cost of rabies vaccination. *Journal of Acute Disease* **5**, 488-492, doi:<https://doi.org/10.1016/j.joad.2016.08.019> (2016).
- 27 Lyu, C. *et al.* Burden of Bites by Dogs and Other Animals in Los Angeles County, California, 2009-2011. *Public Health Reports* **131**, 800-808, doi:10.1177/0033354916675148 (2016).
- 28 Touré, G., Angoulangouli, G. & Méningaud, J.-P. Epidemiology and classification of dog bite injuries to the face: A prospective study of 108 patients. *Journal of Plastic, Reconstructive & Aesthetic Surgery* **68**, 654-658, doi:<https://doi.org/10.1016/j.bjps.2015.01.001> (2015).
- 29 Tepsumethanon, V. *et al.* Survival of Naturally Infected Rabid Dogs and Cats. *Clinical Infectious Diseases* **39**, 278-280, doi:10.1086/421556 (2004).
- 30 Faber, M. *et al.* A Single Amino Acid Change in Rabies Virus Glycoprotein Increases Virus Spread and Enhances Virus Pathogenicity. *Journal of Virology* **79**, 14141-14148, doi:10.1128/jvi.79.22.14141-14148.2005 (2005).
- 31 Babes, V. *Traité de la rage*. in: BN Fields, DM Knipe (Eds.) *Virology*. 2nd edn., (Raven Press, New York, NY, 1990).
- 32 Etheart, M. D. *et al.* Effect of counselling on health-care-seeking behaviours and rabies vaccination adherence after dog bites in Haiti, 2014-2015: a retrospective follow-

up survey. *The Lancet Global Health* **5**, e1017-e1025, doi:10.1016/S2214-109X(17)30321-2.
